# Supplementary material for: TAR syndrome causal gene RBM8A is critical for embryonic bone development and proper Hedgehog signaling
Source: Research Square preprint supplement (doi:10.21203/rs.3.rs-9543669/v1), 2026-05-05
Supplement: Supplementary file 1 [file d685d73636d657c9bbdce60d.docx]

**Supplementary Information**

**TAR syndrome causal gene *RBM8A* is critical for embryonic bone development and proper Hedgehog signaling**

Jennifer Mott1, Zifei Pei1, Jiawan Sun2, Choong Heon Lee3, Twishi Puri1, Zander M. Sachs1, Ana Aviles Vargas4, Nicholas Blaha5, Mabel Tong1, Aimin Liu1, Yong Wang4, Yongsoo Kim5, Santhosh Girirajan2, Jiangyang Zhang3, Yingwei Mao1,*

1 Department of Biology, Pennsylvania State University, University Park, PA 16802, USA

2 Department of Biochemistry and Molecular Biology, Pennsylvania State University, University Park, PA 16802, USA

3 Bernard and Irene Schwartz Center for Biomedical Imaging, Department of Radiology, New York University School of Medicine, New York, NY 10016, USA

4 Department of Biomedical Engineering, Pennsylvania State University, University Park, PA 16802, USA

5 Department of Neuroscience and Experimental Therapeutics, College of Medicine, Pennsylvania State University, Hershey, PA 17033, USA

* corresponding author (yzm1@psu.edu)

**Supplementary Methods**

Tissue Optical Clearing

Commercially available SHIELD (Stabilization under Harsh conditions via Intramolecular Epoxide Linkages to prevent Degradation) preservation, passive clearing reagents, and detailed protocols were obtained from LifeCanvas Technologies (Cambridge, MA, USA). Samples were incubated in SHIELD OFF solution for 3 days at 4 °C on an orbital shaker. Subsequently, the SHIELD OFF solution was replaced with SHIELD ON buffer and incubated for 24 hours at 37 °C with shaking. Tissues were incubated in 20 mL of delipidation buffer with 10 μl of SYTOX™ Deep Red Nucleic Acid Stain (Thermo Fisher Scientific, catalog #: S11381) at 37 °C for 7 days. To match the refractive index (RI) of the delipidated tissues (RI = 1.52), samples were incubated in 20 mL of 50% EasyIndex (LifeCanvas Technologies, catalog #: EI-Z1001) + 50% distilled water for 1 day, then switched to 100% EasyIndex solution for another day at 37 °C with gentle shaking.

Lightsheet Fluorescence Microscopy Imaging

Tissue optical cleared samples were embedded in an agarose solution containing 2% low-melting agarose (MilliporeSigma, catalog #: A2576) in EasyIndex using a custom sample holder. Embedded samples were incubated in EasyIndex at 37 °C overnight, then imaged using the SmartSPIM lightsheet fluorescence microscope (LifeCanvas Technologies, Cambridge, MA, USA). During imaging, the sample holder arm supporting the embedded sample was immersed in an index-matched immersion liquid. The imaging setup consisted of a 3.6X objective lens (LifeCanvas Technologies, 0.2 NA, 12 mm working distance, 1.8 μm lateral resolution), three lasers at 488 nm, 561 nm, and 642 nm, and a 5 μm z-step size. Maximum intensity projections were generated for visualization. For quantification, Fiji (ImageJ) was used to define regions of interest (ROIs) for the forelimbs and crania, then the total tissue area and Ai14 signal-positive area were measured. The area-normalized Ai14 signal intensity was calculated as the ratio of Ai14 signal-positive area to the total ROI area.

Forced Swimming

Mice were individually placed in a transparent cylinder (8 cm in diameter and 11 cm in height) filled with water (25 ± 1°C) while being video-recorded. Each session lasted for 6 minutes, and the duration of immobility was recorded during the final 4 minutes. Immobility was defined as the absence of active escape behaviors, with only minimal movements necessary to keep its head above water. Time spent being immobile was manually scored using the video recording by three separate lab members blinded to genotype, and the results were averaged. Water was changed between mice, and the water temperature was checked with a thermometer before each trial.

Nesting Test

Mice were individually housed in clean cages and provided with a single pre-weighed compressed cotton nesting material. Nesting was evaluated at 1, 3, 6, 24, and 36 hours following the introduction of nesting material, with a photo record at each time point. The scoring was performed using those photos with a standardized 5-point scale as previously described54. Three separate lab members blinded to genotype independently evaluated the nesting score, and the results were averaged.

Cylinder Test

Mice were placed in a clear glass cylinder (8 cm in diameter and 11 cm in height) and video-recorded for 10 minutes. The videos were manually scored by three lab members (blinded to genotype) for independent, weight-bearing contacts on the side of the cylinder wall to assess forelimb asymmetry. The results were averaged, and percentages of left and right paw contact, as well as both paw contact, were calculated.

Quantitative Reverse Transcription–PCR (qRT-PCR)

The total RNAs were converted into cDNA by reverse transcription with the oligo-dT primer, using Superscript reverse transcriptase III (Invitrogen, catalog #: 18080093). qRT-PCR was performed using PowerTrack SYBR Green Master Mix for qPCR (Applied Biosystems, catalog #: A46109) with the following primers (5′–3′): GREM1 (F: TCTTCTCCGTGTCCTCCTGA, R: GTGAGCGTAGTGAGCAGCAG), RUNX2 (F: GACTGTGGTTACCGTCATGGC, R: ACTTGGTTTTTCATAACAGCGGA), FOXF1 (F: AGAGGAAGAGGGCAGGAGTG, R: TGTCAGGGAGGACTTGGTGA), CCND1 (F: GCAAGTCAAGAGGAGCAGGA, R: GGAAGAGGTAGGTGGAGGAG). The expression of the β-Actin gene (F: CGTGGGCCGCCCTAGGCACCA, R: TTGGCCTTAGGGTTCAGG GGGG) was used as an internal control. Primers were designed using NCBI Primer-BLAST and synthesized by IDT. The qPCR reactions were performed on a StepOnePlus Real-Time PCR system (Applied Biosystems, Carlsbad, CA, USA), and the Ct calculations were performed using StepOne software version 2.3.

Generation of the *Pf4*-*Cre*; *Rbm8af/+* and *Pf4-Cre; Rbm8af/f* Mice

*Rbm8a*-floxed mice (*Rbm8af/f*) without the Neo cassette were previously generated in our lab25,26,28. These mice were then crossed with *Pf4-Cre* (Jackson Laboratory, stock #: 008535) to selectively knock out *Rbm8a* in megakaryocytes. The resulting *Pf4-Cre; Rbm8af/+* and subsequent *Pf4-Cre; Rbm8af/f* mice display significant reductions in platelet counts.

Complete Blood Count (CBC) Test

A minimum of 40 uL blood was collected from each adult mouse via cardiac puncture under terminal anesthesia and collected into BD Microtainer blood collection tubes (BD, catalog #: 365974). The CBC test was performed using ProCyte Dx Veterinary CBC Hematology Analyzer (IDEXX, Westbrook, ME, USA) by the Penn State Animal Resource Program staff.

**Supplementary Figure Legends**

**
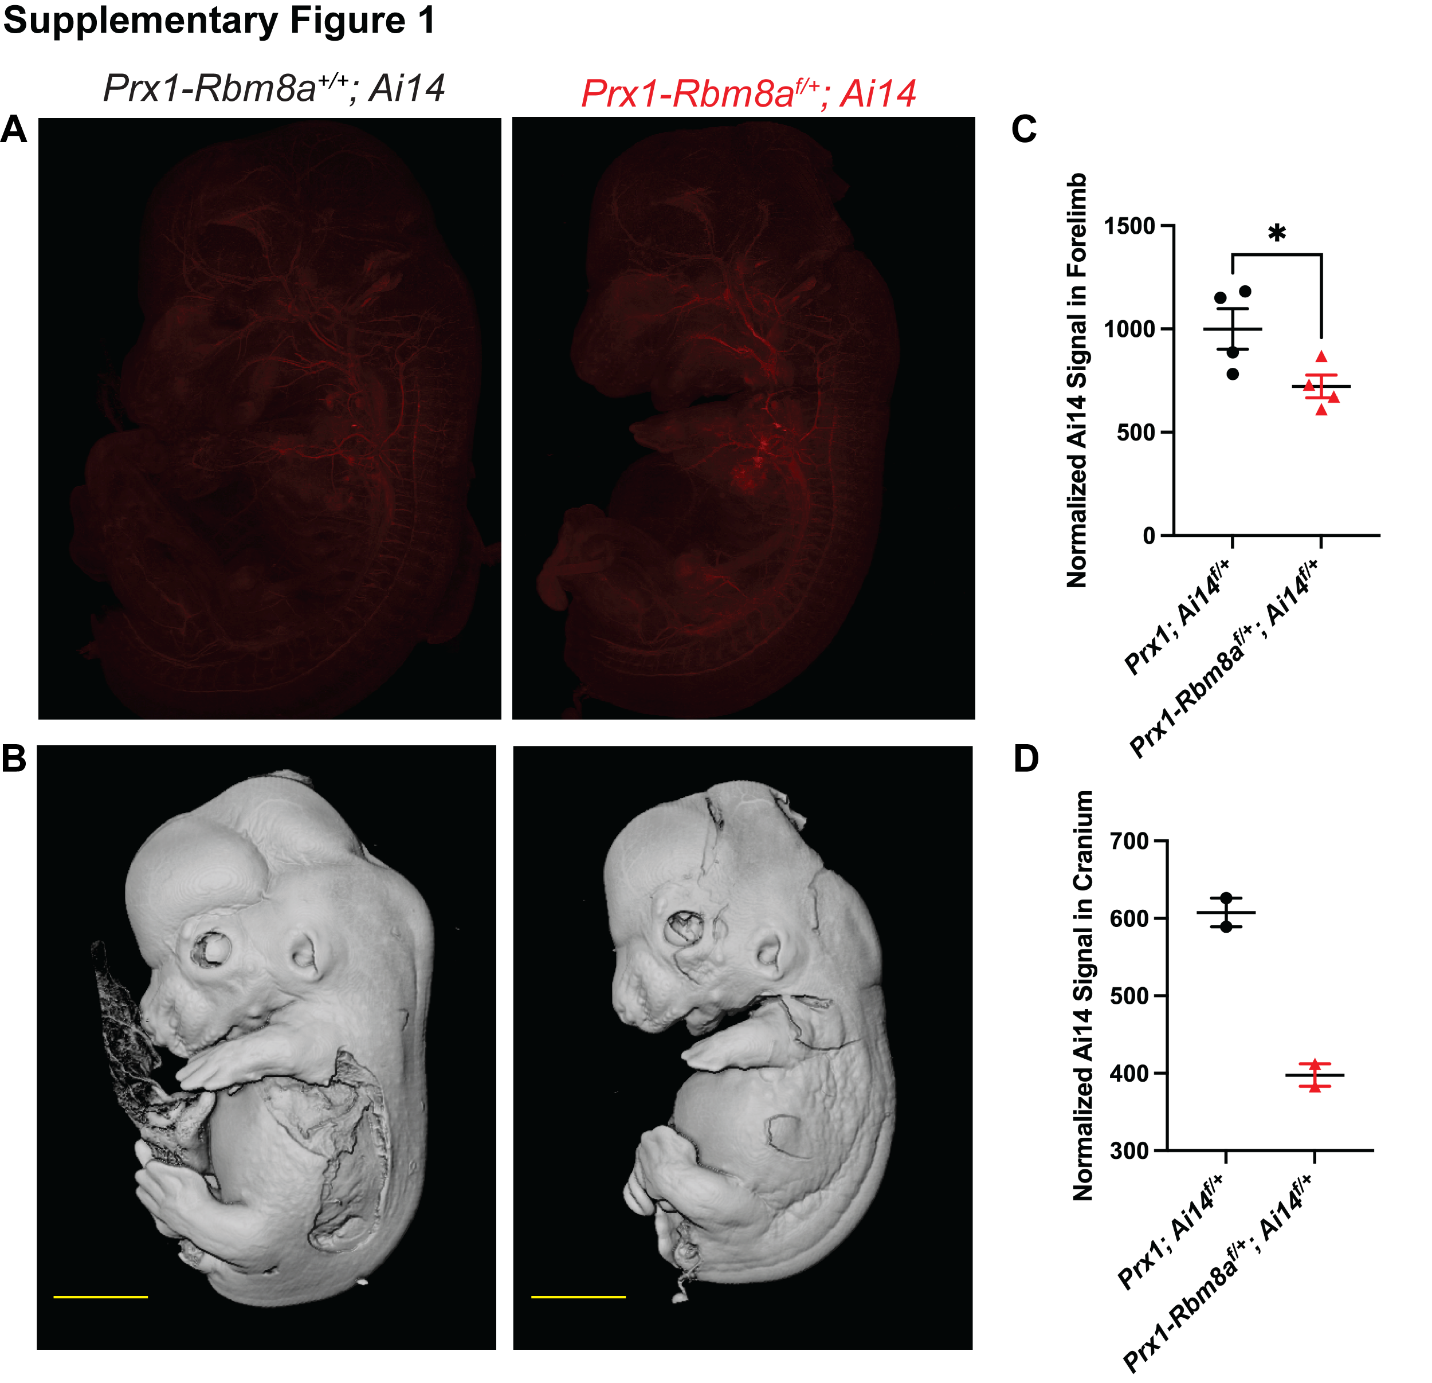
Supplementary Figure 1: Tissue optical cleared E15 *Prx1; Ai14f/+* mice (control) and *Prx1-Rbm8af/+; Ai14f/+* embryos.**

**A.** Lightsheet imaging of tissue optical cleared E15 *Prx1; Ai14f/+* (control) and *Prx1-Rbm8af/+; Ai14f/+* embryos showing Ai14 (tdTomato) reporter signal.

**B.** Representative 3D rendering images of tissue optical cleared E15 *Prx1; Ai14f/+* (control) and *Prx1-Rbm8af/+; Ai14f/+* embryos. Scale bar = 100 µm.

**C.** Quantification and statistical analysis of area-normalized Ai14 signal intensity in the forelimbs of E15 *Prx1; Ai14f/+* (control) and *Prx1-Rbm8af/+; Ai14f/+* embryos. Ai14 signal intensity in the forelimbs was significantly reduced in *Prx1-Rbm8af/+; Ai14f/+* embryos compared to controls. Mean ± SEM (n=4 per group). Unpaired *t*-test. **, p < 0.01.

**D.** Quantification and statistical analysis of area-normalized Ai14 signal intensity in the crania of E15 *Prx1; Ai14f/+* (control) and *Prx1-Rbm8af/+; Ai14f/+* embryos. Ai14 signal intensity in the crania was noticeably reduced in *Prx1-Rbm8af/+; Ai14f/+* embryos compared to controls. Mean ± SEM (n=2 per group).

**
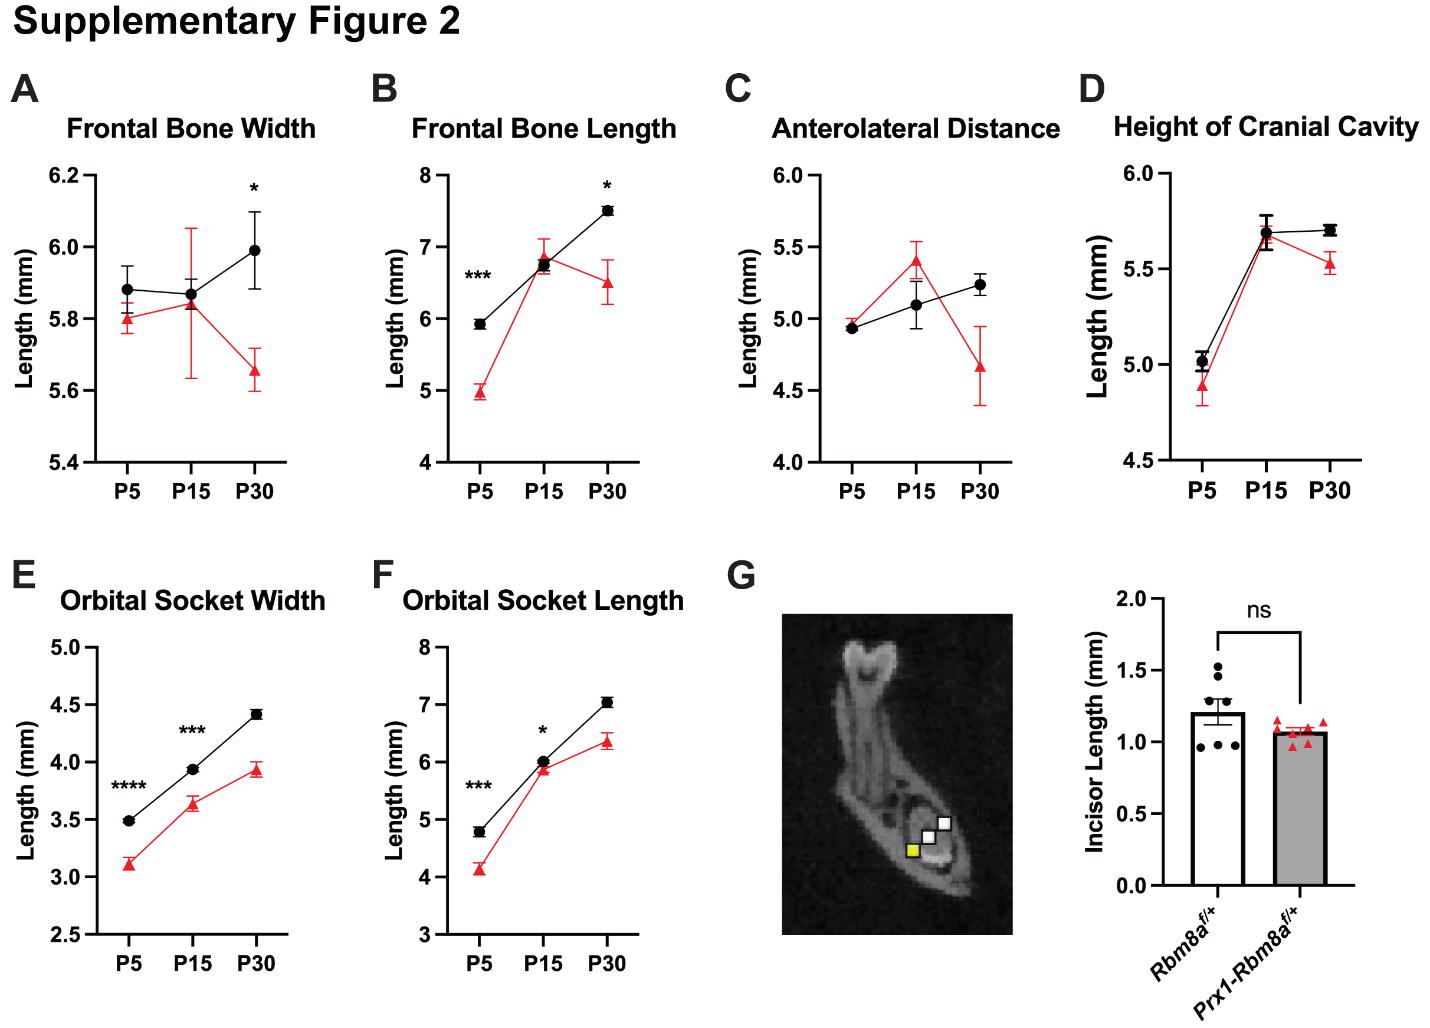
Supplementary Figure 2: Additional quantification of craniofacial landmarks of *Prx1-Rbm8af/+* and control mice across developmental timepoints.**

Quantification and statistical analyses of (A) frontal bone widths, (B) frontal bone lengths, (C) distance between the anterolateral corners of the frontal bone, (D) height of cranial cavity between bregma and intersphenoidal synchondrosis, (E) orbital socket width, (F) orbital socket length, and (G) representative micro-CT scan image of incisor length (left) and quantification and statistical analyses (right) of incisor length of *Prx1-Rbm8af/+* mice (red) and control mice (black) across developmental timepoints (P5, P15, P30). Mean ± SEM (n=3 per group). Unpaired *t*-test. *, p < 0.05, **, p < 0.01, ***, p < 0.001, ****, p < 0.0001.

**
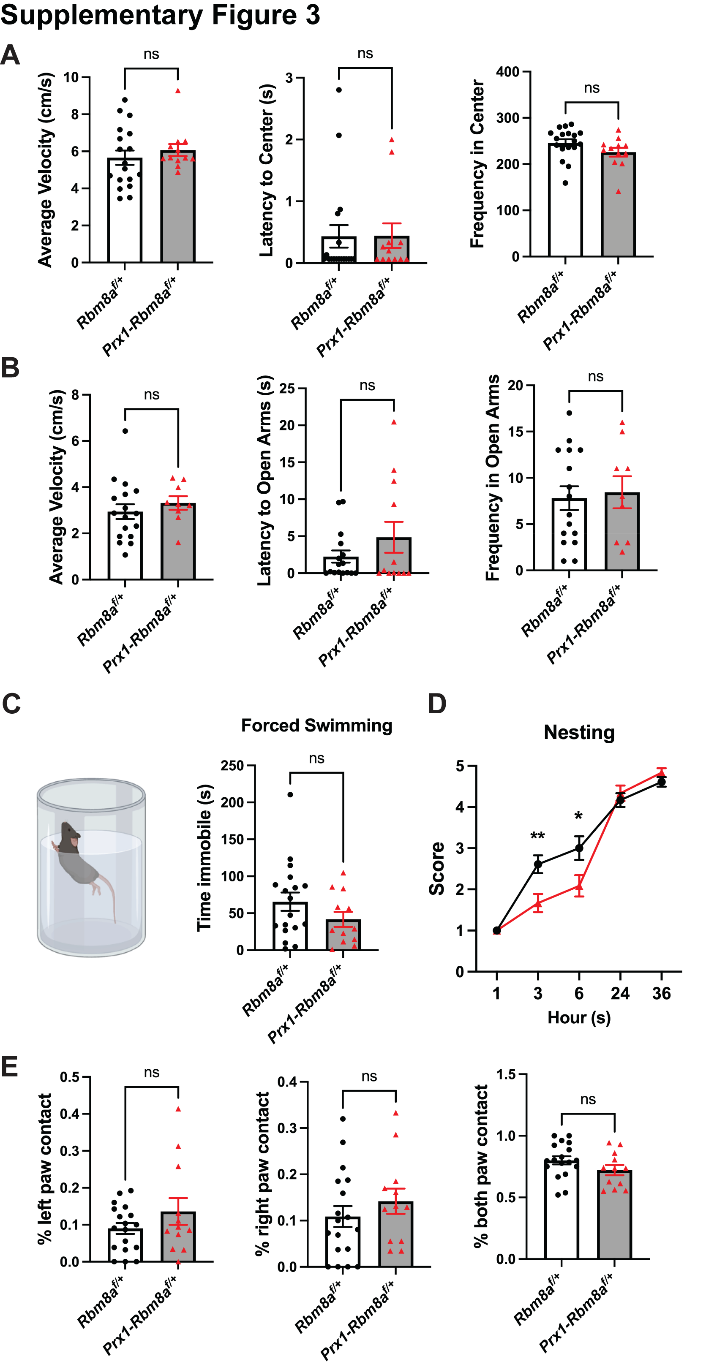
**

**Supplementary Figure 3: Additional results from behavioral tests on *Prx1-Rbm8af/+* and control mice.**

**A.** Open field test results. *Prx1-Rbm8af/+* mice and control mice had comparable average velocity, latency to the enter, and frequency in the center. Mean ± SEM (n=30 total; control: n=18 (9 males, 9 females); mutant: n=12 (5 males, 7 females)). Unpaired *t*-test. ns, not significant.

**B.** Elevated plus maze test results. *Prx1-Rbm8af/+* mice and control mice had comparable average velocity, latency to the open arms, and frequency in the open arms.Mean ± SEM (n=30 total; control: n=18 (9 males, 9 females); mutant: n=12 (5 males, 7 females)). Unpaired *t*-test. ns, not significant.

**C.** Forced swimming test to measure depressive-like behavior. *Prx1-Rbm8af/+* mice and control mice had comparable immobility time. Mean ± SEM (n=30 total; control: n=18 (9 males, 9 females); mutant: n=12 (5 males, 7 females)). Unpaired *t*-test. ns, not significant. Created with BioRender.com.

**D.** Nesting test to evaluate general health, innate goal-directed behavior, and motor function deficits. Nest scores were recorded at 1, 3, 6, 24, and 36 hours following the introduction of nesting material. *Prx1-Rbm8af/+* mice (red) had significantly lower nesting scores at earlier timepoints (3 and 6 hours) but ultimately reached comparable scores, indicating delayed nest-building behavior compared to controls (black). Mean ± SEM (n=30 total; control: n=18 (9 males, 9 females); mutant: n=12 (5 males, 7 females)). Unpaired *t*-test. *, p < 0.05, **, p < 0.01.

**E.** Cylinder test to evaluate forelimb use asymmetry during vertical exploration. Both *Prx1-Rbm8af/+* mice and control mice had symmetric use of left and right forelimbs. Mean ± SEM (n=30 total; control: n=18 (9 males, 9 females); mutant: n=12 (5 males, 7 females)). Unpaired *t*-test. ns, not significant.

**
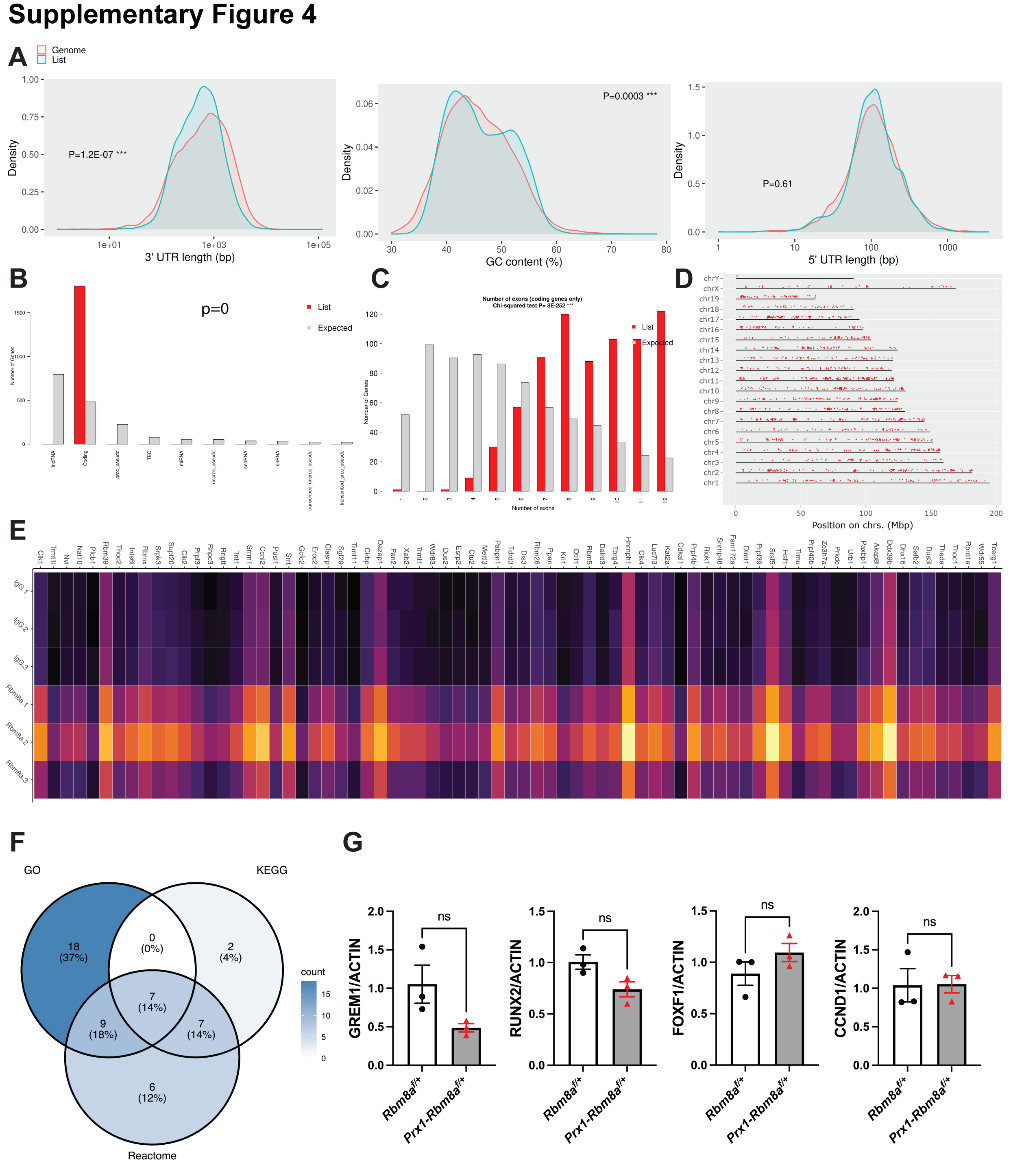
**

**Supplementary Figure 4: Transcript feature analysis and pathway enrichment of RBM8A-associated RNAs reveal preferential binding to long, complex transcripts and cilia-related gene networks.**

**A.** Transcript feature distribution plots show that RBM8A-associated transcripts (“list”; blue) were significantly enriched for a narrower and shorter 3’ UTR length range, and a modest but significant shift toward higher GC content compared to background (“genome”; red). No significant difference was observed in 5’ UTR length between RBM8A-associated transcripts and background. Chi-squared test.

**B.** Distribution of transcript biotypes for RBM8A-associated transcripts (“list”; red) compared to the genomic background (“expected”; gray). RBM8A-associated transcripts were strongly enriched for protein-coding genes. (P = 0).

**C.** Distribution of number of exons per coding gene for RBM8A-associated transcripts (“list”; red compared to background (“expected”; gray). RBM8A-associated genes were significantly enriched for genes with more exons. Chi-squared test (P = 8 × 10⁻²⁵²).

**D.** Chromosomal distribution plot of RBM8A-associated genes across the genome, indicating broad genomic representation without strong chromosomal bias.

**E.** Heat map of transcripts enriched in RBM8A immunoprecipitates associated with RNA splicing and processing pathways showing relative expression across samples. Values represent normalized expressions and are displayed as row-wise z-scores. 3 replicates of IgG (top) on the left and 3 replicates from RBM8A immunoprecipitates (bottom).

**F.** Overlap of enriched pathways identified across GO, KEGG, and Reactome databases, highlighting shared enrichment in biological processes related to the Hedgehog signaling pathway.

**G.** qRT-PCR results of additional genes involved in developmental signaling pathways using RNA extracted from E15 forelimbs of *Prx1-Rbm8af/+* and control embryos. Relative gene expression was quantified using the ΔΔCt method and normalized to Actin. Not statistically significant, but a trend towards reduced expression of *Grem1* and *Runx2* was observed in *Prx1-Rbm8af/+* relative to controls. *Foxf1* and *Ccnd1* expressions were comparable in *Prx1-Rbm8af/+* relative to controls. Mean ± SEM (n=3 per group). Unpaired t-test. ns, not significant.

**
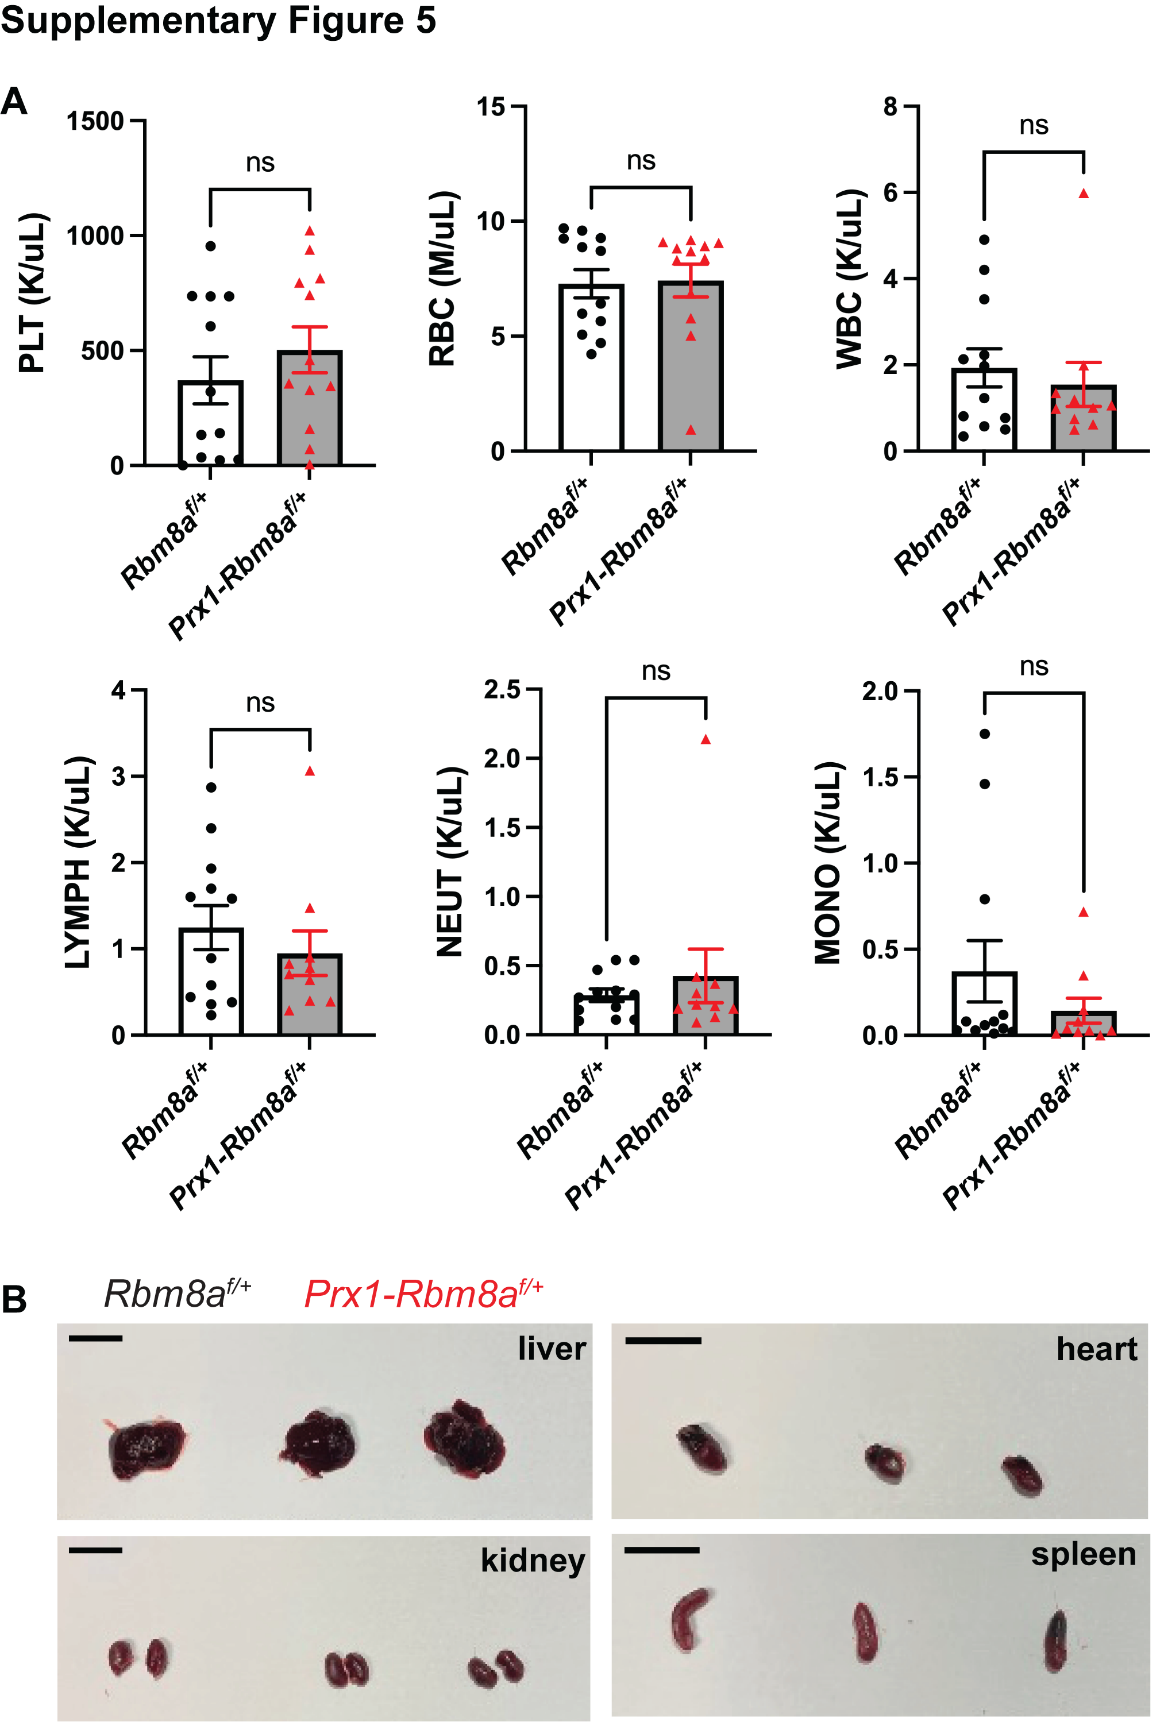
**

**Supplementary Figure 5: Characterization of additional organs of *Prx1-Rbm8af/+* mice.**

**A.** CBC results of adult *Prx1-Rbm8af/+* (gray bar) and control mice (white bar). No statistical difference was observed in numbers of platelets (PLT), red blood cells (RBC), white blood cells (WBC), lymphocytes (LYMPH), neutrophils (NEUT), or monocytes (MONO) in blood samples of *Prx1-Rbm8af/+* mice compared to those of control mice. Mean ± SEM (n=10 per group). Unpaired *t*-test. ns, not significant.

**B.** Representative images of livers, hearts, kidneys, and spleens of *Rbm8af/+* mice (left) and *Prx1-Rbm8af/+* mice (center and right). Scale bar = 1 cm.

**
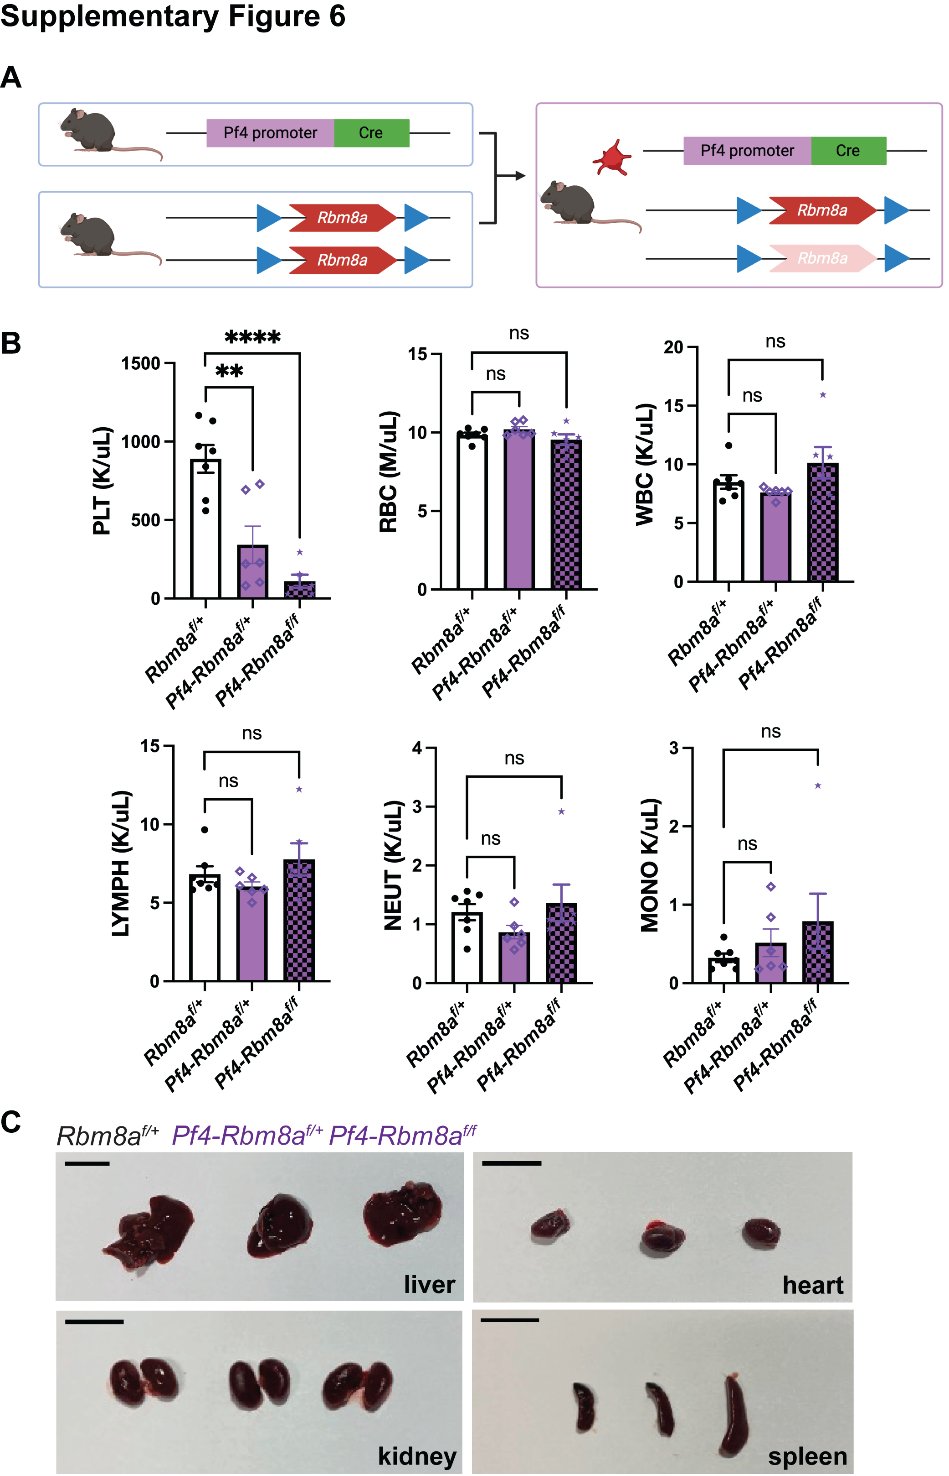
**

**Supplementary Figure 6: Generation of a platelet-specific cKO mouse model.**

**A.** Schematic of the breeding strategy used to generate *Pf4-Rbm8af/+* mice. *Rbm8af/f*  mice were crossed with *Prx1-Cre* mice to generate *Pf4-Cre; Rbm8af/+* offspring, which have selective deletion of *Rbm8a* in megakaryocytes and platelets. Created with BioRender.com.

**B.** CBC results of adult heterozygous *Pf4-Rbm8af/+* mice (solid purple bar), homozygous *Pf4-Rbm8af/f* mice (patterned purple bar), and control mice (white bar). Platelet (PLT) count was significantly reduced in heterozygous *Pf4-Rbm8af/+* mice, and even more drastically reduced in homozygous *Pf4-Rbm8af/f* mice, compared to that of control mice. No statistical difference was observed in red blood cells (RBC), white blood cells (WBC), lymphocytes (LYMPH), neutrophils (NEUT), or monocytes (MONO) in blood samples of *Pf4-Rbm8af/+* or *Pf4-Rbm8af/f* mice compared to those of control mice. Mean ± SEM (n =6 per group). Unpaired *t*-test. ns, not significant, **, p < 0.01, ****, p < 0.0001.

**C.** Representative images of livers, hearts, kidneys, and spleens of *Rbm8af/+* mice (left), heterozygous *Pf4-Rbm8af/+* mice (center), and homozygous *Pf4-Rbm8af/f* mice (right). The spleen of homozygous *Pf4-Rbm8af/f* mouse is noticeably larger than that of *Rbm8af/+* or heterozygous *Pf4-Rbm8af/+* mouse. Scale bar = 1 cm.
